# Supplementary material for: Intrinsic Epigenetic Regulation of the D4Z4 Macrosatellite Repeat in a Transgenic Mouse Model for FSHD
Source: PLoS Genet. 2013 Apr 4;9(4):e1003415. doi: 10.1371/journal.pgen.1003415 (PMC3616921; doi:10.1371/journal.pgen.1003415)
Supplement: Table S6 — Overview of the histological and functional tests performed to investigate muscle integrity and performance in D4Z4-2.5 mice. (XLS) [file pgen.1003415.s016.xls]

## Sheet: Sheet1
Supplementary Table 6: overview of the histological and functional tests performed to investigate muscle integrity and performance in D4Z4-2.5 mice.
Procedure		Experimental setup				Analysis	Result			Remarks
Treatment	Timeframe	n	Age	Gender	Tissue	Read-out	WT	D4Z4-2.5	mdx-/-
None		n=3	11 weeks	F	EDL muscle	Fiber size	150-2943μm2	190-1676μm2		1000-3000 fibers/mouse. No significant difference, trend observed
						% Centered nuclei	--	--		between 1000-2000 nuclei/mice assessed
None		n=3	9 months	M	Complete dissection*	Histology by pathologist	--	--		No difference in histology and pathology for studied tissues
15º Decline Down-hill running**		n=9	9-10 weeks	M	-	2 limbs hanging wire	9,8±0,4	8,6±2,7	1,9	One hour after down-hill running
					-	Grip strength**	30,8±7,4	29,7±8,5	26,1±4,5	Before down-hill running (measured 7 days)
					-	Grip strength**	29,6±10	29,4±9,9	19,2±5,5	Directly after down-hill running (measured 7 days)
					Blood	Creatine kinase levels	369±275	586±346	6440	Measured 24h after every cycle of running
					Triceps	EBD uptake	-	-	+++
					Gastrocn.	EBD uptake	-	-	+++
					Triceps	% Centered nuclei	2,9±1,4	3,6±1,6	89,1	Assessed a minimun of 1880 nuclei per mouse
					Triceps	Gene expression#	normal	normal	Deregulated	WT serves as control
					Gastrocn.	Gene expression#	normal	normal	Deregulated	WT serves as control
Cardiotoxin (im injection)	Day 10	n=3	11 weeks	M	Gastrocn.	% Fibrotic tissue	10,7±2,9	8,9±3,4
Cardiotoxin (im injection)	Day 28	n=3	11 weeks	M	Gastrocn.	% Fibrotic tissue	6,5±0,9	8,6±2,5		No significant difference, trend observed
						% Centered nuclei	57±15,2	68±12		No significant difference, trend observed
						Fiber size	100-6257μm2	100-7754μm2		781-1600 fibers/mouse. High variation but no difference observed
*The following tissues have been histological examined by HE staining on parafin embedded tissue:
Head tissue: Sternomastoid (muscle), masseter, temporalis, tongue, head
Lateral surface front leg: Acromiotrapezius, Triceps Brachii long head, Triceps Brachii lateral, Scapula muscle Right
Thorax: Pectoralis, Abdominal
Leg: Lumbo dorsal fascia, Gluteus superficialis, Biceps femoralis + Semitendious, Gastrocnemius
Organs: Iliac lymph node, Submandibullary glands + lymph nodes, spleen, pancreas, kidneys, sternum, liver, Intestine, stomach, Jejenum, Ileum, cecum, colon, testis plus epidermus, lung, heart and thymus
** Grip strengths: gram strength/ gram bodyweight
#Expression of Spp1, Ctsk, Itgb2, Tnnt2, Col3a1, MyoG were quantified by q RT-PCR
